# Supplementary material for: Reduced White Matter Integrity in Sibling Pairs Discordant for Bipolar Disorder
Source: Atypon-hosted journal article supplement (doi:10.1176/appi.ajp.2013.12111462), 2013-11-01
Supplement: 1317_ds001.pdf [file 1317_ds001.pdf]

## Supplementary Materials

### Segmentation of regions-of-interest

Anatomical regions-of-interest were identified using the John Hopkins University Probabilistic Tractography Atlas and John Hopkins University White Matter Labels Atlas, both integrated in FSL. Masks derived from the tractography atlas, thresholded at probabilities  $>25\%$ , were used for the uncinate fasciculi and callosal regions. These masks were smoothed at 1.05 mm FWHM and binarized ( $>0$ ). Masks derived from the white matter labels atlas were used to segment all other regions. These masks were smoothed with a kernel of 1.1 mm FWHM, thresholded at  $>0.2$  and binarized. Accurate overlap with the TBSS skeleton was visually verified (**Supplementary Figure S1**). Each mask was multiplied by the TBSS skeleton mask to obtain a parcellation of the center of each region-of-interest and mean FA values within each region was extracted for each subject.

**Figure S1. Regions of interest as determined by the John Hopkins University probabilistic tractography and white matter labels atlases.**

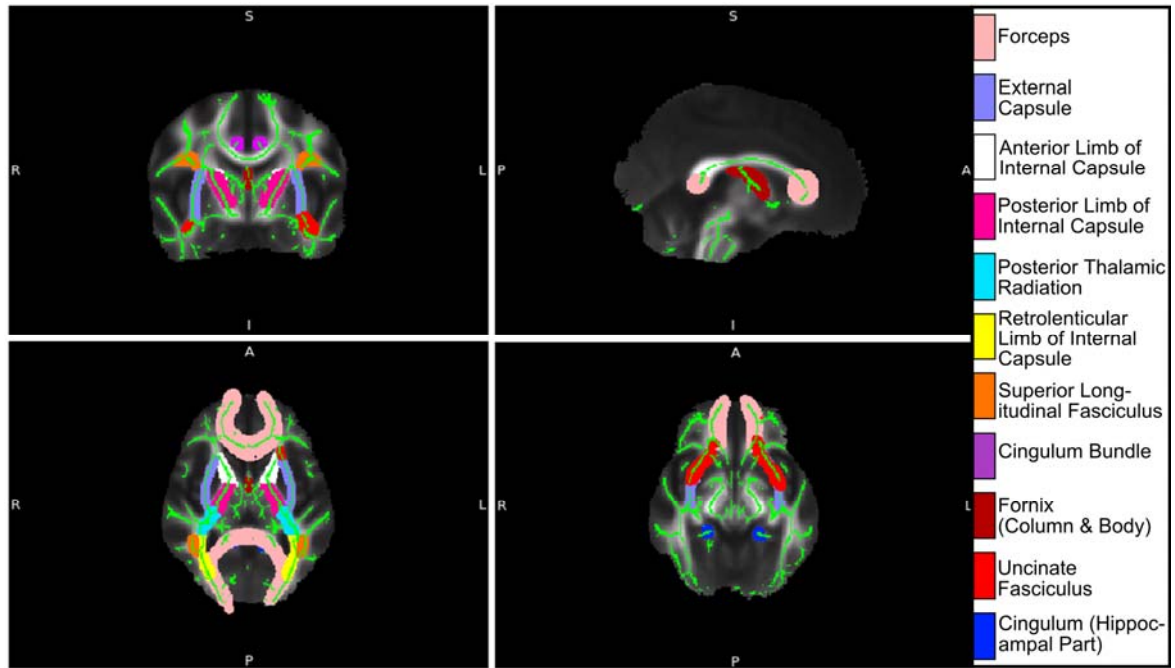

**Figure S2. Reduced FA in patients compared to controls, according to “cluster-extent” significance, corrected at  $p_{FWE} < 0.05$ .**

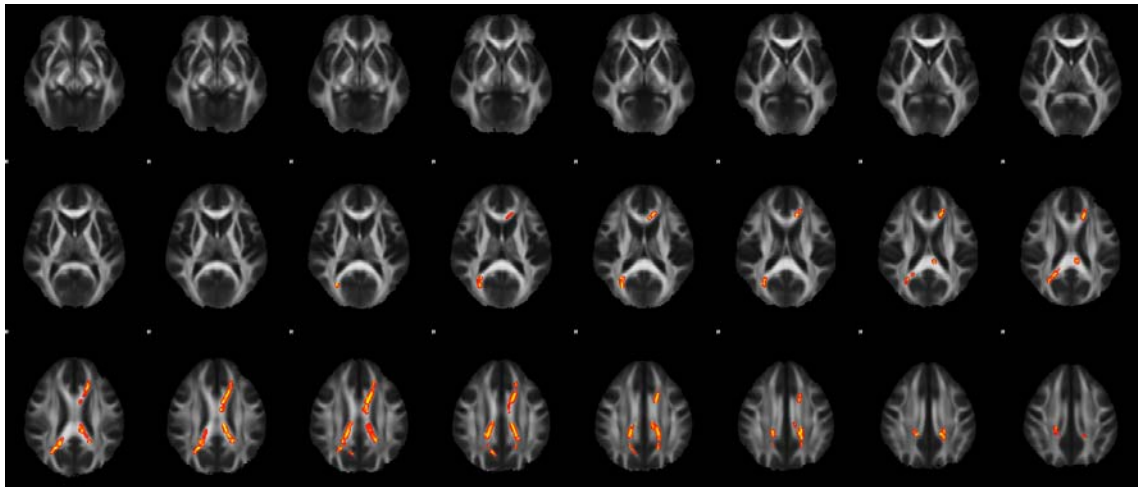

Figure S3. Plot showing the correlation between mean FA in the case-control cluster and duration of illness since the first episode of mania.

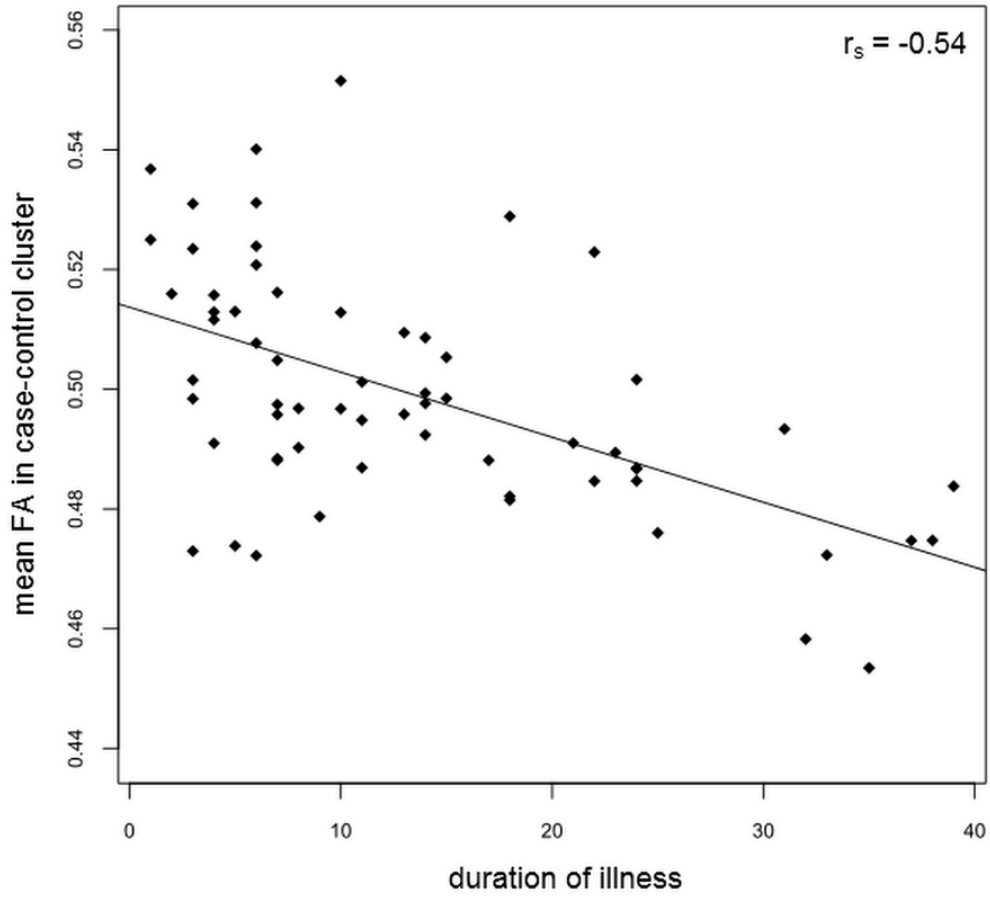

**Supplementary Table S1. Locations of significant TBSS voxels of the case-control contrast ( $P_{FWE} < 0.05$ ).**

| #voxels | Max TFCE<br>MNI coordinates | Atlas anatomical structures                                                                                                                                                                        |
|---------|-----------------------------|----------------------------------------------------------------------------------------------------------------------------------------------------------------------------------------------------|
| 46,935  | -16, -30, 30                | All of the 20 tracts from the Probabilistic Tractography Atlas and 45 out of 48 regions from the White Matter Labels Atlas (not the left tapetum and bilateral hippocampal parts of the cingulum). |
| 242     | 19, 50, 14                  | Unclassified                                                                                                                                                                                       |
| 190     | 8, 52, -18                  | Unclassified                                                                                                                                                                                       |
| 126     | 13, 33, 42                  | Unclassified                                                                                                                                                                                       |
| 72      | 9, -41, 63                  | Unclassified                                                                                                                                                                                       |
| 22      | 32, 41, 23                  | Unclassified                                                                                                                                                                                       |
| 13      | 32, 34, 20                  | Unclassified                                                                                                                                                                                       |

Note that TFCE modifies the values of each voxel to reflect not only its own t-statistic but also those of other voxels within the same consecutive TFCE-specific “cluster”. While in TFCE the peak statistic reflects a maximum of a function of both of spatial extent and local effect size, the traditional peak-voxel of t-static reflects the maximum local effects size only. Thus, these statistics do not necessarily point to the same peak voxel. Please refer to Smith & Nichols (2009) for a complete explanation of TFCE.

**Supplementary Table S2. Locations of significant TBSS voxels of the sibling-control contrast ( $P_{FWE} < 0.05$ ).**

| #voxels | Max TFCE<br>MNI coordinates | Atlas anatomical structures (> 10% probability) |
|---------|-----------------------------|-------------------------------------------------|
| 1,552   | -1, 0-35, 20                | Splenium and body of corpus callosum,           |
| 401     | -27, -64, 12                | Posterior thalamic radiation                    |
| 127     | 25, -53, 25                 | Splenium, posterior corona radiata              |
| 83      | -34, -18, 35                | Superior longitudinal fasciculus                |
| 69      | -38, -48, 19                | Superior longitudinal fasciculus                |
| 26      | -16, -30, 31                | Body and splenium of corpus callosum            |
